# Supplementary material for: Step Back and Reassess - What Physicians See as Challenges in Treating Patients with Acute Bleeding: International, Mixed Qualitative and Quantitative Study.
Source: Research Square preprint supplement (doi:10.21203/rs.3.rs-115997/v1), 2020-12-02
Supplement: Supplementary file 1 [file 00eb16881476a5c3bc9828b5.pdf]

## Step back and reassess – What physicians see as challenges in treating patients with acute bleeding: international, mixed qualitative and quantitative study

Tadzio R. Roche<sup>1</sup>, Doreen J. Wetli<sup>1</sup>, Julia Braun<sup>2</sup>, Ezequiel D. Kataife<sup>3</sup>, Federico G. Mileo<sup>3</sup>, Donat R. Spahn<sup>1</sup>, David W. Tscholl<sup>1,\*</sup>, Sadiq Said<sup>1</sup>

### Additional file 2 – Quantitative results and statements

#### Statements used in the field survey:

- Q1 How would you rate the difficulty of acute coagulation management?
- Q2 Acute coagulation management is a complex subject for me.
- Q3 I frequently feel time pressure when treating a bleeding patient.
- Q4 I regard human factors (such as communication, teamwork, and leadership) essential for successful coagulation management.
- Q5 I consider the interpretation of diagnostic coagulation tests (such as ROTEM, lab values) hard to understand.
- Q6 I consider acute coagulation management challenging in anticoagulated patients.
- Q7 I am under the impression that I lack practice in acute coagulation management.
- Q8 I consider precise algorithms and evidence-based guidelines helpful for coagulation management.
- Q9 In my daily practice, I usually know the first therapeutic steps in acute bleeding situations and know what to do.
- Q10 I consider the availability of resources (e.g., diagnostic test facilities, sufficient staff availability) essential for optimal coagulation management.

#### Abbreviations and definitions used in the document:

|                    |                                                                        |
|--------------------|------------------------------------------------------------------------|
| Experience         | Professional experience in years.                                      |
| HIBA               | Hospital Italiano de Buenos Aires.                                     |
| Rating Q1:         | 1 =very difficult, 2=difficult, 3=neutral, 4=easy, 5=very easy         |
| Ratings Q2 to Q10: | 1=Strongly disagree, 2= Disagree, 3=Neutral, 4=Agree, 5=Strongly agree |
| ROTEM_per_year     | Rated number of ROTEM interpreted per year.                            |
| ROTEM_skills       | Self-rated ROTEM skills from 0 (=beginner) to 100 (=expert).           |
| USZ                | University Hospital Zurich.                                            |

# Coagulation management

Version 1.0

Julia Braun

November 20, 2020

## 1 Descriptives

| Variable       | n  | Min | q <sub>1</sub> | $\tilde{x}$ | $\bar{x}$ | q <sub>3</sub> | Max | s    | IQR  | #NA |
|----------------|----|-----|----------------|-------------|-----------|----------------|-----|------|------|-----|
| Experience     | 42 | 0.3 | 3              | 4.2         | 7.0       | 8.0            | 33  | 7.6  | 5.0  | 0   |
| ROTEM_per_year | 42 | 0.0 | 5              | 11.5        | 24.4      | 40.0           | 100 | 27.7 | 35.0 | 0   |
| ROTEM_skills   | 42 | 0.0 | 30             | 50.0        | 48.3      | 64.8           | 100 | 26.6 | 34.8 | 0   |

Table 1: Descriptive table - continuous data

| Variable   | Levels          | n  | %     | $\sum$ % |
|------------|-----------------|----|-------|----------|
| Center     | USZ             | 21 | 50.0  | 50.0     |
|            | HIBA            | 21 | 50.0  | 100.0    |
|            | all             | 42 | 100.0 |          |
| Gender     | Male            | 27 | 64.3  | 64.3     |
|            | Female          | 15 | 35.7  | 100.0    |
|            | all             | 42 | 100.0 |          |
| Profession | Resident        | 22 | 52.4  | 52.4     |
|            | Staff Physician | 20 | 47.6  | 100.0    |
|            | all             | 42 | 100.0 |          |

Table 2: Descriptive table - categorical data

## 2 Medians of questions 1 to 10

Note that there are so many tests in this analysis (10 times Wilcoxon and 10 times Mann-Whitney) that you should use (or at least discuss in the paper) Bonferroni correction. This means that not 0.05 is the level of significance, but rather 0.0025 (the original level of significance divided by 20, the number of tests). Be careful with the interpretation!

| Variable | n  | Min | q <sub>1</sub> | $\tilde{x}$ | q <sub>3</sub> | Max | IQR |
|----------|----|-----|----------------|-------------|----------------|-----|-----|
| Q1       | 42 | 1   | 2              | 2           | 3.0            | 4   | 1.0 |
| Q2       | 42 | 2   | 3              | 4           | 4.0            | 5   | 1.0 |
| Q3       | 42 | 1   | 3              | 4           | 4.8            | 5   | 1.8 |
| Q4       | 42 | 3   | 4              | 5           | 5.0            | 5   | 1.0 |
| Q5       | 42 | 1   | 2              | 3           | 4.0            | 4   | 2.0 |
| Q6       | 42 | 2   | 4              | 4           | 5.0            | 5   | 1.0 |
| Q7       | 42 | 1   | 3              | 4           | 4.8            | 5   | 1.8 |
| Q8       | 42 | 3   | 4              | 5           | 5.0            | 5   | 1.0 |
| Q9       | 42 | 2   | 4              | 4           | 5.0            | 5   | 1.0 |
| Q10      | 42 | 3   | 5              | 5           | 5.0            | 5   | 0.0 |

Table 3: Descriptives of the answers (nonparametric)

The following list contains the p-values of the nonparametric Wilcoxon test for one sample for the null hypothesis that the true location of the median is 3 (neutral answer).

- Q1:  $p = 0.0021$
- Q2:  $p = 0.0046$
- Q3:  $p < 0.0001$
- Q4:  $p < 0.0001$
- Q5:  $p = 0.73$
- Q6:  $p < 0.0001$
- Q7:  $p = 0.001$
- Q8:  $p < 0.0001$
- Q9:  $p < 0.0001$
- Q10:  $p < 0.0001$

### 3 Differences between the centers

| Variable | Levels | n  | Min | q <sub>1</sub> | $\tilde{x}$ | q <sub>3</sub> | Max | IQR |
|----------|--------|----|-----|----------------|-------------|----------------|-----|-----|
| Q1       | USZ    | 21 | 1   | 2              | 2           | 3.0            | 4   | 1.0 |
|          | HIBA   | 21 | 2   | 2              | 3           | 3.0            | 4   | 1.0 |
|          | all    | 42 | 1   | 2              | 2           | 3.0            | 4   | 1.0 |
| Q2       | USZ    | 21 | 2   | 3              | 4           | 4.0            | 5   | 1.0 |
|          | HIBA   | 21 | 2   | 3              | 3           | 4.0            | 4   | 1.0 |
|          | all    | 42 | 2   | 3              | 4           | 4.0            | 5   | 1.0 |
| Q3       | USZ    | 21 | 3   | 4              | 4           | 5.0            | 5   | 1.0 |
|          | HIBA   | 21 | 1   | 3              | 3           | 4.0            | 5   | 1.0 |
|          | all    | 42 | 1   | 3              | 4           | 4.8            | 5   | 1.8 |
| Q4       | USZ    | 21 | 3   | 4              | 5           | 5.0            | 5   | 1.0 |
|          | HIBA   | 21 | 4   | 5              | 5           | 5.0            | 5   | 0.0 |
|          | all    | 42 | 3   | 4              | 5           | 5.0            | 5   | 1.0 |
| Q5       | USZ    | 21 | 2   | 2              | 3           | 4.0            | 4   | 2.0 |
|          | HIBA   | 21 | 1   | 2              | 3           | 4.0            | 4   | 2.0 |
|          | all    | 42 | 1   | 2              | 3           | 4.0            | 4   | 2.0 |
| Q6       | USZ    | 21 | 2   | 4              | 4           | 5.0            | 5   | 1.0 |
|          | HIBA   | 21 | 3   | 4              | 4           | 4.0            | 5   | 0.0 |
|          | all    | 42 | 2   | 4              | 4           | 5.0            | 5   | 1.0 |
| Q7       | USZ    | 21 | 1   | 3              | 3           | 5.0            | 5   | 2.0 |
|          | HIBA   | 21 | 2   | 3              | 4           | 4.0            | 5   | 1.0 |
|          | all    | 42 | 1   | 3              | 4           | 4.8            | 5   | 1.8 |
| Q8       | USZ    | 21 | 4   | 5              | 5           | 5.0            | 5   | 0.0 |
|          | HIBA   | 21 | 3   | 4              | 4           | 5.0            | 5   | 1.0 |
|          | all    | 42 | 3   | 4              | 5           | 5.0            | 5   | 1.0 |
| Q9       | USZ    | 21 | 2   | 4              | 4           | 5.0            | 5   | 1.0 |
|          | HIBA   | 21 | 3   | 4              | 4           | 5.0            | 5   | 1.0 |
|          | all    | 42 | 2   | 4              | 4           | 5.0            | 5   | 1.0 |
| Q10      | USZ    | 21 | 3   | 4              | 5           | 5.0            | 5   | 1.0 |
|          | HIBA   | 21 | 3   | 5              | 5           | 5.0            | 5   | 0.0 |
|          | all    | 42 | 3   | 5              | 5           | 5.0            | 5   | 0.0 |

Table 4: Descriptives of the answers by center

The following list contains the p-values for a Mann-Whitney test comparing the answers between USZ and HIBA (again, think of Bonferroni correction, see comment above):

- Q1:  $p = 0.08$
- Q2:  $p = 0.17$
- Q3:  $p = 0.03$
- Q4:  $p = 0.15$
- Q5:  $p = 0.52$
- Q6:  $p = 0.17$

- Q7:  $p = 0.87$
- Q8:  $p = 0.0033$
- Q9:  $p = 0.64$
- Q10:  $p = 0.51$

## 4 Influence of experience

We use median regression to see if the experience of the participants has an influence on their answers. All results were the same: There was no evidence for an influence of the experience. Apart from that, the estimates were close to zero in most cases, so that they would not be clinically relevant.

## 5 Interrater agreement

Percent agreement between the two raters was 86.15% with a Cohen's Kappa of 0.85, indicating strong agreement between the two raters.

## R version and packages used to generate this report

R version: R version 3.6.2 (2019-12-12)

Base packages: stats, graphics, grDevices, utils, datasets, methods, base

Other packages: quantreg, SparseM, irr, lpSolve, dplyr, stringr, reporttools, xtable, ggplot2, knitr

This document was generated on 2020-11-20 at 11:29.
