# Supplementary material for: Step Back and Reassess - What Physicians See as Challenges in Treating Patients with Acute Bleeding: International, Mixed Qualitative and Quantitative Study.
Source: Research Square preprint supplement (doi:10.21203/rs.3.rs-115997/v1), 2020-12-02

**Additional file 3 – Word cloud, what is easy in coagulation management**

This cloud represents the answers to the question: “What do you find easy in coagulation management?”.

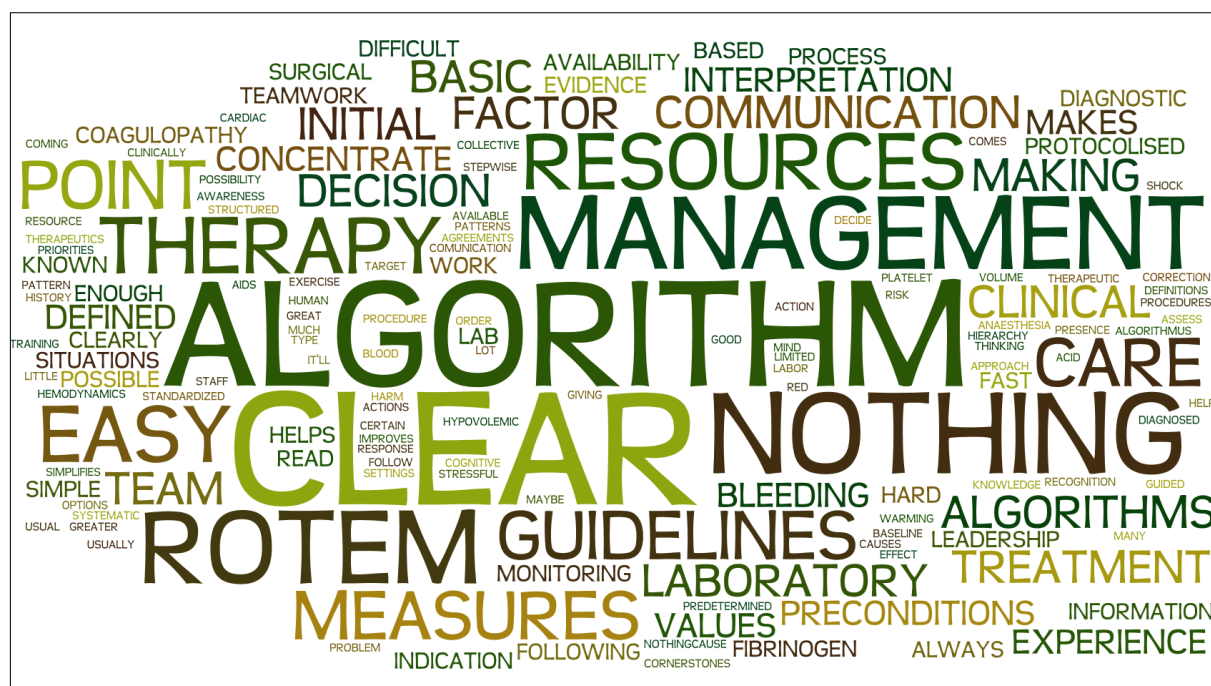

Supplement: Supplementary file [file 17cabac3591564900ab71499.pdf]
