# Supplementary material for: Step Back and Reassess - What Physicians See as Challenges in Treating Patients with Acute Bleeding: International, Mixed Qualitative and Quantitative Study.
Source: Research Square preprint supplement (doi:10.21203/rs.3.rs-115997/v1), 2020-12-02
Supplement: Supplementary file [file f85a73264565992f3148bb10.pdf]

## Step back and reassess – What physicians see as challenges in treating patients with acute bleeding: international, mixed qualitative and quantitative study

Tadzio R. Roche<sup>1</sup>, Doreen J. Wetli<sup>1</sup>, Julia Braun<sup>2</sup>, Ezequiel D. Kataife<sup>3</sup>, Federico G. Mileo<sup>3</sup>, Donat R. Spahn<sup>1</sup>, David W. Tscholl<sup>1,\*</sup>, Sadiq Said<sup>1</sup>

### **Additional file 1 - All translated participants' field notes**

This document contains all translated field notes of the coagulation management survey study. We translated the answers using Deepl.com (DeepL GmbH, Cologne, Germany). The answers listed are anonymous.

#### **Participant 1:**

**Question 1:** What is difficult about coagulation management?

[Interpretation of ROTEM]  
[Clinic and laboratory differ greatly]

**Question 2:** What is easy about coagulation management?

[Exercise improves management]  
[Surgical hemostasis is the easiest]

#### **Participant 2:**

**Question 1:** What is difficult about coagulation management?

[A lot of information]  
[Fear of making mistakes]  
[Dosage]

**Question 2:** What is easy about coagulation management?

[Initial measures are clear]

**Participant 3:**

**Question 1:** What is difficult about coagulation management?

[Lack of experience]

[Hardly any overview of the laboratory parameters, difficult to find your way around]

[Interpretation of the parameters is difficult]

[Pressure that it is important for patients]

**Question 2:** What is easy about coagulation management?

[Clear guidelines with limit values]

**Participant 4:**

**Question 1:** What is difficult about coagulation management?

[-]

**Question 2:** What is easy about coagulation management?

[Simple if you have algorithm in mind]

**Participant 5:**

**Question 1:** What is difficult about coagulation management?

[Coagulation management is complex]

**Question 2:** What is easy about coagulation management?

[-]

**Participant 6:**

**Question 1:** What is difficult about coagulation management?

[Different pathways and many factors]

[Hardly any ROTEM experience]

**Question 2:** What is easy about coagulation management?

[Wrong therapy has little effect]

[Benefits are greater than disadvantages]

**Participant 7:**

**Question 1:** What is difficult about coagulation management?

[Effect of anticoagulants on specific factors]

[Implementation of the internal directive]

**Question 2:** What is easy about coagulation management?

[Nothing, it's difficult. Maybe with practice, it'll be easy.]

**Participant 8:**

**Question 1:** What is difficult about coagulation management?

[Complex, many factors to consider.]

[Time factor waiting for values versus acute situation makes it difficult.]

**Question 2:** What is easy about coagulation management?

[Initial measures are simple.]

[The cornerstones are clear.]

**Participant 9:**

**Question 1:** What is difficult about coagulation management?

[Experience.]

[Interpretation of Rotem.]

**Question 2:** What is easy about coagulation management?

[Clear guidelines help]

**Participant 10:**

**Question 1:** What is difficult about coagulation management?

[Pathophysiological relationships are difficult to understand.]

[A lot to memorize.]

[Not derivable.]

**Question 2:** What is easy about coagulation management?

[Read algorithm.]

[Basic measures are clear.]

**Participant 11:**

**Question 1:** What is difficult about coagulation management?

[Time pressure in unstable situations.]

[A lot of information must be collected.]

[Interpretation of the coagulation system.]

[Pre-treatment with anticoagulants.]

**Question 2:** What is easy about coagulation management?

[Algorithm gives clear definitions.]

[Distribution of work.]

**Participant 12:**

**Question 1:** What is difficult about coagulation management?

[Timely correct interpretation of the ROTEM is difficult.]

[In general, the time management is also demanding.]

**Question 2:** What is easy about coagulation management?

[Interpretation of the usual parameters and correction of these is easy.]

[Implementation of the basic measures.]

**Participant 13:**

**Question 1:** What is difficult about coagulation management?

[Lack of practice.]

[Under time pressure.]

[Many information at the same time]

**Question 2:** What is easy about coagulation management?

[Therapy clear when problem/deficiency is diagnosed]

**Participant 14:**

**Question 1:** What is difficult about coagulation management?

[Very complex to understand in theory.]

[Little contact with it.]

**Question 2:** What is easy about coagulation management?

[Nothing, it's difficult.]

**Participant 15:**

**Question 1:** What is difficult about coagulation management?

[Inexperienced.]

[Very high clinical time pressure.]

[High scope of the decisions.]

**Question 2:** What is easy about coagulation management?

[A good algorithm makes management easy.]

[Decision making is discussed in the team, so agreements are possible.]

**Participant 16:**

**Question 1:** What is difficult about coagulation management?

[to identify the cause of the bleeding.]

[to know reference values.]

[Inexperience with ROTEM.]

[History of the patient must be taken into account (e.g. anticoagulation).] [Challenging.]

**Question 2:** What is easy about coagulation management?

[Experience of values simplifies their application.]

**Participant 17:**

**Question 1:** What is difficult about coagulation management?

[Complex.]

[Many points to think about]

**Question 2:** What is easy about coagulation management?

[-]

**Participant 18:**

**Question 1:** What is difficult about coagulation management?

[hardly any contact as a beginner.]

[Time pressure.]

[Impact of the decision.]

[Very complex subject.]

**Question 2:** What is easy about coagulation management?

[Nothing.]

**Participant 19:**

**Question 1:** What is difficult about coagulation management?

[Algorithm must be repeated.]

[There is a lot to consider overall.]

**Question 2:** What is easy about coagulation management?

[Algorithm helps in stressful situations.]

**Participant 20:**

**Question 1:** What is difficult about coagulation management?

[Interpretation of ROTEM analysis]

**Question 2:** What is easy about coagulation management?

[-]

**Participant 21:**

**Question 1:** What is difficult about coagulation management?

[Often not all information available.]  
[Identifying the problem is difficult.]  
[Little experience.]  
[Little training.]  
[Complex.]

**Question 2:** What is easy about coagulation management?

[Algorithms makes it easy.]  
[Action is predetermined.]  
[Information.]

**Participant 22:**

**Question 1:** What is difficult about coagulation management?

[Criteria and decision making]

**Question 2:** What is easy about coagulation management?

[-]

**Participant 23:**

**Question 1:** What is difficult about coagulation management?

[delayed lab results.]  
[Fast dynamics.]  
[Unstable situations.]

**Question 2:** What is easy about coagulation management?

[Algorithms; defined order.]  
[ROTEM as fast response.]  
[Basic actions are clear.]



**Participant 24:**

**Question 1:** What is difficult about coagulation management?

[many variables.]

[Lack of knowledge.]

[Different measurement methods]

**Question 2:** What is easy about coagulation management?

[Nothing]

**Participant 25:**

**Question 1:** What is difficult about coagulation management?

[Differentiate what is important what is less important]

**Question 2:** What is easy about coagulation management?

[-]

**Participant 26:**

**Question 1:** What is difficult about coagulation management?

[Substitution without values]

**Question 2:** What is easy about coagulation management?

[-]

**Participant 27:**

**Question 1:** What is difficult about coagulation management?

[DOACs management.]

[What type of monitoring to use for each clinical scenario and according to the senior anaesthesiologist]

**Question 2:** What is easy about coagulation management?

[initial management]

[fluidtherapy]

[fibrinogen replacement]

**Participant 28:**

**Question 1:** What is difficult about coagulation management?

[The amount of variables to manage at the same time]

[Cognitive overload]

[Time pressure]

[Human factor]

[Low frequency of the event]

[Lack of training]

**Question 2:** What is easy about coagulation management?

[Monitoring tools availability]

### **Participant 29:**

**Question 1:** What is difficult about coagulation management?

[When special situations occur (DOACs management, congenital disease, hidden bleeding)]  
 [time pressure]  
 [lack of consensus amongst physicians]  
 [timing for interventions]  
 [clinical assesment]

**Question 2:** What is easy about coagulation management?

[-]

### **Participant 30:**

**Question 1:** What is difficult about coagulation management?

[ROTEM, as a monitoring, admitted lack of study.]  
 [Balancing fluids and coagulation management.]  
 [Chaos situation, lack of consensus and guidance for management of the situation.]  
 [Human factor in terms of team working (communication, performance, leadership, etc)]

**Question 2:** What is easy about coagulation management?

[baseline conditions management (warming, volume reposition, etc).]

### **Participant 31:**

**Question 1:** What is difficult about coagulation management?

[lack of consensus]  
 [not following any guideline or algorithm]  
 [state of the art management]  
 [human factor]  
 [algorithms not adapted to the users or their resources]

**Question 2:** What is easy about coagulation management?

[The mere existence of algorithm should make it easy, read and execute.]

### **Participant 32:**

**Question 1:** What is difficult about coagulation management?

[monitoring criteria for Lab test (when to ask i.e. AntiXa, ROTEM, etc.)]  
[therapeutic resources administration, a lot of options available.]

**Question 2:** What is easy about coagulation management?

[the presence of an algorithm to follow helps a lot.]  
[not hard to clinically assess a bleeding.]

### **Participant 33:**

**Question 1:** What is difficult about coagulation management?

[specific coagulation disorders management]  
[resources management]  
[human factor]  
[anticoagulants management (Xabans and antiII)]

**Question 2:** What is easy about coagulation management?

[monitoring lab and clinical assessment]

### **Participant 34:**

**Question 1:** What is difficult about coagulation management?

[Time pressure and delay of the analysis]

**Question 2:** What is easy about coagulation management?

[Algorithm with clear structured procedure]  
[fast diagnostics via point of care laboratory]  
[Resources available]  
[enough staff]

**Participant 35:**

**Question 1:** What is difficult about coagulation management?

[Many factors must be interpreted simultaneously]

**Question 2:** What is easy about coagulation management?

[Algorithmus]

[Labor]

[Rotem (point of care)]

**Participant 36:**

**Question 1:** What is difficult about coagulation management?

[anticoagulants-antiplatelet management (emergency bleeding patients on these drugs )]

[communication amongst physicians in the team]

[when to stop a massive transfusion]

**Question 2:** What is easy about coagulation management?

[Hierarchy]

[Treatment priorities]

[Leadership comes easy based on training and knowledge.]

**Participant 37:**

**Question 1:** What is difficult about coagulation management?

[Duration until laboratory values arrive]

[Anticipating the course of bleeding]

**Question 2:** What is easy about coagulation management?

[Clearly defined]

[Experience]

**Participant 38:**

**Question 1:** What is difficult about coagulation management?

[Impact of the decision]

[Time until the laboratory arrives]

**Question 2:** What is easy about coagulation management?

[Many resources]

**Participant 39:**

**Question 1:** What is difficult about coagulation management?

[Lack of consensus amongst people]

[if correct treatment was administered, confidence in treatment]

[Chaos situation]

[Establishing appropriate order, treatment priorities]

**Question 2:** What is easy about coagulation management?

[Following lab values]

[There are enough resources (diagnostic/therapeutics)]

[Having algorithms]

**Participant 40:**

**Question 1:** What is difficult about coagulation management?

[they are life threatening situation, where time pressure is evident]

[high stress levels for decision making]

[lack of consensus]

[the absence of tangible elements to treat in the clinical field (factors, platelets, etc)]

[lack of experience / knowledge on certain fields]

**Question 2:** What is easy about coagulation management?

[the possibility to generate a stepwise/protocolised approach to a complex scenario]

### **Participant 41:**

**Question 1:** What is difficult about coagulation management?

[the different complex scenarios (emergency, trauma, scheduled surgery, etc)]  
 [treatment priorities, where to begin]  
 [lack of consensus generating waste of time]

**Question 2:** What is easy about coagulation management?

[When we have expected situations (known patient history, high risk bleeding procedures)]

### **Participant 42:**

**Question 1:** What is difficult about coagulation management?

[Time until laboratory values arrive.]

**Question 2:** What is easy about coagulation management?

[Initial measures are clearly defined.]  
 [Rotem and Point of care Laboratory makes it easy.]

### **Participant 43:**

**Question 1:** What is difficult about coagulation management?

[Monitoring data on time (ROTEM, LAB, ETC)]  
 [Decision making balanced on clinical assessment rather than analytical]  
 [Lack of consensus amongst physicians]  
 [Anemia treatment and transfusion triggers.]

**Question 2:** What is easy about coagulation management?

[Tranexamic acid indication]  
 [Fibrinogen concentrate indication]  
 [Situational awareness]  
 [Resources management]

**Participant 44:**

**Question 1:** What is difficult about coagulation management?

[Time delay due to laboratory values.]

[Assessment of the clinic]

**Question 2:** What is easy about coagulation management?

[Clear guidelines.]

[Algorithm]

**Participant 45:**

**Question 1:** What is difficult about coagulation management?

[Many factors to consider.]

[Impact.]

[Waiting on labs.]

**Question 2:** What is easy about coagulation management?

[Clear guidelines.]

[Point of care Laboratory.]

**Participant 46:**

**Question 1:** What is difficult about coagulation management?

[Effect with risk of thrombosis.]

[Duration of the laboratory values.]

[Low experience.]

**Question 2:** What is easy about coagulation management?

[Clear guidelines.]

[Point of care]

[Rotem.]



**Participant 47:**

**Question 1:** What is difficult about coagulation management?

[Estimate kinetics.]

[Time delay until laboratory arrives.]

[Availability of the products.]

**Question 2:** What is easy about coagulation management?

[Clear guidelines.]

[Great evidence of the measures.]

**Participant 48:**

**Question 1:** What is difficult about coagulation management?

[Much information to process, but standardized]

**Question 2:** What is easy about coagulation management?

[Much information to process, but standardized]

**Participant 49:**

**Question 1:** What is difficult about coagulation management?

[Time until laboratory values arrive]

[Indication for coagulation substitution]

**Question 2:** What is easy about coagulation management?

[Rotem]

[Algorithm]

**Participant 50:****Question 1:** What is difficult about coagulation management?

[Give the right medication at the right time.]

[Interpretation is difficult.]

[Time pressure.]

**Question 2:** What is easy about coagulation management?

[Rotem and point of care Laboratory.]

[Factor substitution.]

**Participant 51:****Question 1:** What is difficult about coagulation management?

[Results show outdated conditions.]

[Time delay of the laboratory.]

[Documentation of circumstances often insufficient.]

**Question 2:** What is easy about coagulation management?

[Nothing.]

**Participant 52:****Question 1:** What is difficult about coagulation management?

[Anticipating, estimating the dynamics.]

[Multifactorial.]

[Occurs rarely, therefore lack of practice. ]

**Question 2:** What is easy about coagulation management?

[limited therapy options.]

[Teamwork.]

**Participant 53:**

**Question 1:** What is difficult about coagulation management?

[Time pressure.]

[Inexperience.]

**Question 2:** What is easy about coagulation management?

[Nothing.]

**Participant 54:**

**Question 1:** What is difficult about coagulation management?

[Order-priorization]

[Multiple possible treatments]

**Question 2:** What is easy about coagulation management?

[Preconditions are always the same.]

**Participant 55:**

**Question 1:** What is difficult about coagulation management?

[Decision making]

[Tests interpretation]

[Treatment timing (priorities)]

**Question 2:** What is easy about coagulation management?

[Nothing]

**Participant 56:**

**Question 1:** What is difficult about coagulation management?

[Transfusion thresholds]

[ROTEM interpretation]

[Treatment timing ]

**Question 2:** What is easy about coagulation management?

[Cognitive aids]

**Participant 57:**

**Question 1:** What is difficult about coagulation management?

[Anticoagulant reversion (Noacs)]

[Abnormal results without bleeding]

**Question 2:** What is easy about coagulation management?

[Preconditions treatment are always the same]

**Participant 58:**

**Question 1:** What is difficult about coagulation management?

[Timely decision making]

[Test interpretation]

[Time pressure]

**Question 2:** What is easy about coagulation management?

[Nothing]

**Participant 59:**

**Question 1:** What is difficult about coagulation management?

[Timely interventions are difficult]

[Test interpretation]

**Question 2:** What is easy about coagulation management?

[Nothing]

**Participant 60:**

**Question 1:** What is difficult about coagulation management?

[Lab monitoring]

[right treatment]

**Question 2:** What is easy about coagulation management?

[cause diagnosis (surgical/coagulopathy)]

**Participant 61:**

**Question 1:** What is difficult about coagulation management?

[lack of consensus amongst physicians]

[anticoagulants]

[topic dislike]

**Question 2:** What is easy about coagulation management?

[Nothing]

**Participant 62:**

**Question 1:** What is difficult about coagulation management?

[little practice with ROTEM]  
[reflective learning]  
[lack of self confidence]  
[lack of consensus or official algorithm]

**Question 2:** What is easy about coagulation management?

[Clinical patterns in certain scenarios (cardiac surgery, trauma)]

**Participant 63:**

**Question 1:** What is difficult about coagulation management?

[time pressure]  
[clinical severity]  
[decision correctness]  
[lack of consensus]

**Question 2:** What is easy about coagulation management?

[ROTEM pattern visuals]  
[having algorithms]

**Participant 64:**

**Question 1:** What is difficult about coagulation management?

[ROTEM interpretation]  
[DOACs management]  
[criteria between PCC and FFP]

**Question 2:** What is easy about coagulation management?

[hemodynamics]  
[red blood cell and platelet therapy]

**Participant 65:****Question 1:** What is difficult about coagulation management?

[DOAC reversal management]  
[hemodynamics]

**Question 2:** What is easy about coagulation management?

[leadership]  
[communication]

**Participant 66:****Question 1:** What is difficult about coagulation management?

[ROTEM interpretation and decision making]  
[Communication with surgeons and senior anaesthesiologists]  
[Timing]  
[stress management]  
[DOAC management]  
[Lab monitoring]  
[Plasma transfusion trigger]

**Question 2:** What is easy about coagulation management?

[having an algorithm]  
[having the resources]

**Participant 67:****Question 1:** What is difficult about coagulation management?

[ROTEM interpretation]

**Question 2:** What is easy about coagulation management?

[communication]  
[decision making in known clinical settings]

**Participant 68:**

**Question 1:** What is difficult about coagulation management?

[ROTEM interpretation]

**Question 2:** What is easy about coagulation management?

[Communication]

[clinical criteria]

**Participant 69:**

**Question 1:** What is difficult about coagulation management?

[timing for decision making]

[gap between diagnostic tests and clinical status]

**Question 2:** What is easy about coagulation management?

[factor concentrate therapy]

[target therapy]

**Participant 70:**

**Question 1:** What is difficult about coagulation management?

[massive haemorrhage where almost everything]

[ROTEM interpretation]

[anticoagulation management]

**Question 2:** What is easy about coagulation management?

[human factor and communication]

[liberty to decide treatment]



**Participant 71:**

**Question 1:** What is difficult about coagulation management?

[timing for decision making]  
[diagnostic turnaround times]  
[human factor organization and priorities]  
[scenario and infrastructure situation]  
[out of OR areas]  
[training]

**Question 2:** What is easy about coagulation management?

[resources availability (diagnostic/therapeutic)]  
[Team work]

**Participant 72:**

**Question 1:** What is difficult about coagulation management?

[surgeon pressure]  
[communication breakdown]

**Question 2:** What is easy about coagulation management?

[resources management]  
[teamwork]  
[collective thinking amongst anaesthesia team]

**Participant 73:****Question 1:** What is difficult about coagulation management?

[timing turnaround for blood components]  
 [ROTEM interpretation]  
 [blood bank communication]  
 [surgeon underestimates the situation]

**Question 2:** What is easy about coagulation management?

[basic preconditions]

**Participant 74:****Question 1:** What is difficult about coagulation management?

[borderline values]  
 [grey zone]  
 [factor concentrate vs hemocomponentes approach]  
 [DOACs management]  
 [surgeon pressure]

**Question 2:** What is easy about coagulation management?

[clear algorithm strongly evidence based]

**Participant 75:****Question 1:** What is difficult about coagulation management?

[Tests interpretation]  
 [Traetment of pre existing conditions]

**Question 2:** What is easy about coagulation management?

[-]

**Participant 76:****Question 1:** What is difficult about coagulation management?

[the absence of a protocol in a crisis situation]

**Question 2:** What is easy about coagulation management?

[ROTEM interpretation]

[type of bleeding recognition]

**Participant 77:****Question 1:** What is difficult about coagulation management?

[antiplatelet drugs related bleeding]

**Question 2:** What is easy about coagulation management?

[hypovolemic shock management and its coagulopathy]

[factor concentrate therapy]

**Participant 78:****Question 1:** What is difficult about coagulation management?

[lack of consensus or standard procedures]

[too much state of the art]

[too many things to do in little time]

[unpredictability of the situation]

[infrequent event]

[platelet function disorders]

**Question 2:** What is easy about coagulation management?

[it's hard to do harm when giving treatment]

[possible causes are usually repeated]

**Participant 79:**

**Question 1:** What is difficult about coagulation management?

[anticoagulant management]

[reversal]

[When I haven't got the ROTEM]

**Question 2:** What is easy about coagulation management?

[Following an algorithm and guided decision making]

**Participant 80:**

**Question 1:** What is difficult about coagulation management?

[diagnostic turnaround times for decision making]

**Question 2:** What is easy about coagulation management?

[Resource management]

[ROTEM management and interpretation]

**Participant 81:**

**Question 1:** What is difficult about coagulation management?

[therapeutic target through diagnostic tools]

**Question 2:** What is easy about coagulation management?

[Nothing.]

**Participant 82:**

**Question 1:** What is difficult about coagulation management?

[timing and coordination in hemodynamics and coagulation management]  
[need for help]  
[time pressure in crisis management]  
[Priorities order]

**Question 2:** What is easy about coagulation management?

[decision making process coming from experience]  
[communication with team members]

**Participant 83:**

**Question 1:** What is difficult about coagulation management?

[multifactorial bleeding cause]  
[turnaround times from lab for decision making]

**Question 2:** What is easy about coagulation management?

[systematic, it is protocolised]

**Participant 84:**

**Question 1:** What is difficult about coagulation management?

[Much information to process]  
[timing for decision making]

**Question 2:** What is easy about coagulation management?

[target therapy]
